# Supplementary material for: Fabrication of fullerene-decorated carbon nanotubes and their application in flame-retarding polypropylene
Source: Royal Society of Chemistry journal article supplement (doi:10.1039/b9nr00026g), 2009-01-01
Supplement: b9nr00026g.pdf [file b9nr00026g.pdf]

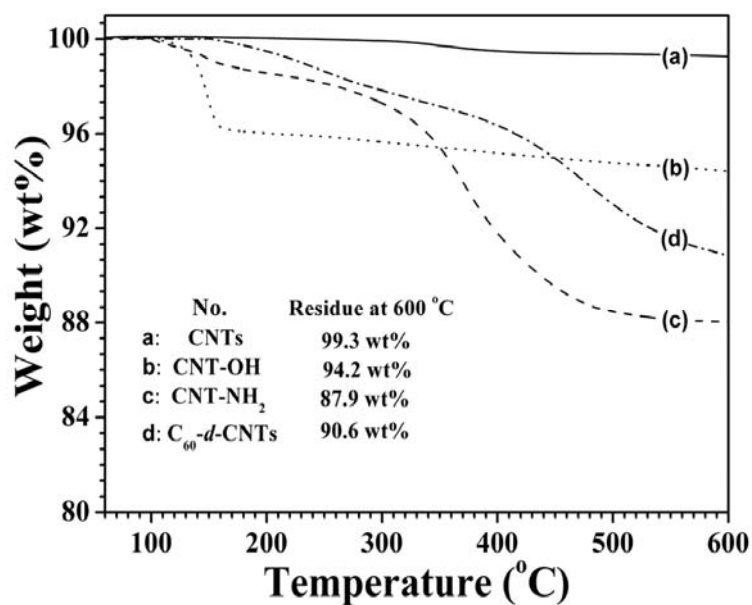

**Fig. 1** TGA curves of pristine CNTs and its functionalized derivatives in nitrogen atmosphere

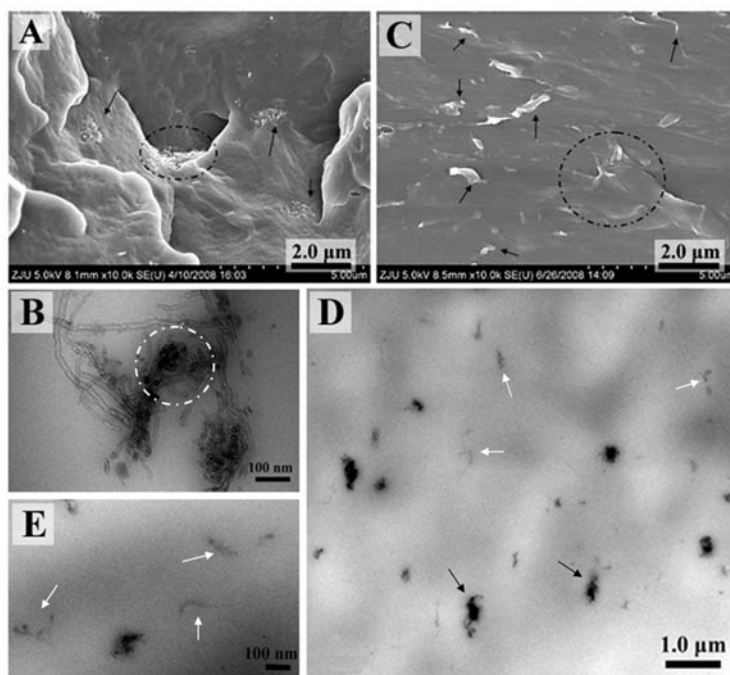

**Fig. 2** SEM images of (A) CNTs and (C) C<sub>60</sub>-d-CNTs, TEM images (B) CNTs and (D, E) C<sub>60</sub>-d-CNTs in polypropylene matrix
